1 **The effect of assortative mixing on stability of low helminth transmission levels and on the impact**  
2 **of mass drug administration: model explorations for onchocerciasis**

3 Anneke S. de Vos, Wilma A. Stolk, Sake J. de Vlas, Luc E. Coffeng\*

4 Department of Public Health, Erasmus MC, University Medical Center Rotterdam, Rotterdam, The  
5 Netherlands

6 \* Corresponding author: l.coffeng@erasmusmc.nl

7

8 **Abstract**

9 *Background:* Stable low pre-control prevalences of helminth infection are not uncommon in field  
10 settings, yet it is poorly understood how such low levels can be sustained, thereby challenging efforts  
11 to model them. Disentangling possible facilitating mechanisms is important, since these may  
12 differently affect intervention impact. Here we explore the role of assortative (i.e. non-homogenous)  
13 mixing and exposure heterogeneity in helminth transmission, using onchocerciasis as an example.

14 *Methodology/Principal Findings:* We extended the established individual-based model ONCHOSIM to  
15 allow for assortative mixing, assuming that individuals who are relatively more exposed to fly bites  
16 are more connected to each other than other individuals in the population as a result of differential  
17 exposure to a sub-population of blackflies. We used the model to investigate how transmission  
18 stability, equilibrium microfilariae (mf) prevalence and intensity, and impact of mass drug  
19 administration depend on the assumed degree of assortative mixing and exposure heterogeneity, for  
20 a typical rural population of about 400 individuals. The model clearly demonstrated that with  
21 homogeneous mixing and moderate levels of exposure heterogeneity, onchocerciasis could not be  
22 sustained below 35% mf prevalence. In contrast, assortative mixing stabilised onchocerciasis  
23 prevalence at levels as low as 8% mf prevalence. Increasing levels of assortative mixing significantly  
24 reduced the probability of interrupting transmission, given the same duration and coverage of mass  
25 drug administration.

26 *Conclusions/Significance:* Assortative mixing patterns are an important factor to explain stable low  
27 prevalence situations and are highly relevant for prospects of elimination. Their effect on the pre-  
28 control distribution of mf intensities in human populations is only detectable in settings with mf  
29 prevalences <30%, where high skin mf density in mf-positive people may be an indication of  
30 assortative mixing. Local spatial variation in larval infection intensity in the blackfly intermediate host  
31 may also be an indicator of assortative mixing.

32

33 Key words: assortative mixing; helminth transmission; low prevalence; onchocerciasis; transmission  
34 stability; elimination; mass drug administration; mathematical modelling

35

## 36 **Author summary**

37 Most mathematical models for parasitic worm infections predict that at low prevalences  
38 transmission will fade out spontaneously because of the low mating probability of male and female  
39 worms. However, sustained low prevalence situations do exist in reality. Low prevalence areas have  
40 become of particular interest now that several worm infections are being targeted for elimination  
41 and the question arises whether transmission in such areas is driven locally and should be targeted  
42 with interventions. We hypothesise that an explanation for the existence of low prevalence areas is  
43 assortative mixing, which is the preferential mixing of high-risk groups among themselves and which  
44 has been shown to play an important role in transmission of other infectious diseases. For  
45 onchocerciasis, assortative mixing would mean that transmission is sustained by a sub-group of  
46 people and a connected sub-population of the blackfly intermediate host that mix preferentially with  
47 each other. Using a mathematical model, we study how assortative mixing allows for sustained low  
48 prevalences and show that it decreases the probability of interrupting transmission by means of  
49 mass drug administration. We further identify data sources that may be used to quantify the degree  
50 of assortative mixing in field settings.

51

## 52 **Introduction**

53 Onchocerciasis prevalence varies widely between geographical locations, with nodule and  
54 microfilaridemia (mf) prevalence levels in adults ranging from just above 0% to over 80% [1,2].  
55 Onchocerciasis control programmes historically aimed for morbidity control and focussed  
56 interventions on so-called meso and hyperendemic areas, i.e. areas with mf prevalence levels above  
57 40%. Many hypoendemic areas (mf prevalence <40%) were left untreated [3]. Now the target has  
58 shifted to elimination the question has arisen whether such hypoendemic areas can maintain  
59 themselves and may act as a source of infection for areas that have achieved elimination. If so,  
60 hypoendemic areas should be covered by elimination campaigns. Answering these questions is not  
61 straightforward, as the transmission dynamics in hypoendemic settings are not fully understood. This  
62 also applies to other helminthic diseases that are currently the subject of large-scale control and  
63 elimination programmes, such as lymphatic filariasis (LF), schistosomiasis and soil-transmitted  
64 helminthiasis.

65 Mathematical models can be useful tools to understand how various processes can help to stabilize  
66 helminth transmission in low endemic areas. Population dynamics of helminth infections are unique  
67 given the need for male and female worms to be present in the same host for reproduction, leading  
68 to a so-called breakpoint prevalence below which transmission cannot maintain itself [4,5]. Most  
69 models for helminth transmission explain sustained low pre-control prevalences by assuming high  
70 degrees of exposure heterogeneity among human hosts [6–10], meaning that some people are  
71 heavily exposed while the majority experience much lower exposure levels. The resulting  
72 concentration of worms in few heavily exposed individuals allows female and male worms to mate,  
73 even if overall worm numbers in the host population are low. In addition, existing models for  
74 helminth transmission typically assume homogeneous mixing. This assumption implies that every  
75 person can infect any other person in the community with probability directly proportional to the  
76 product of one person's contribution and another person's exposure to transmission, as if all  
77 transmission takes place in a singular point in space. However, in reality mixing patterns in helminth

78 transmission are assortative (i.e. non-homogeneous) as sub-groups of human hosts mix preferentially  
79 and transmit infection amongst themselves because they spend different amounts of time in  
80 different shared locations such as e.g. schools, water collection sites, and/or household locations. In  
81 summary, assortative mixing in helminth transmission implies the existence of multiple vector or  
82 environmental reservoirs and differential exposure of individuals to such reservoirs with a sub-group  
83 of high-risk individuals concentrating around at least one of those reservoirs, which is very well  
84 conceivable.

85 Here, we consider for the first time to which extent assortative mixing may play a role in sustaining  
86 low levels of helminth transmission. Assortative mixing has been shown to play an important role in  
87 the transmission of many infections [11–15]. Especially for sexually transmitted or drug-use related  
88 infections, individuals often infect those of similar risk level to their own, as they meet at specific  
89 venues or parties [13,14]. In onchocerciasis transmission, which we consider here, there may be  
90 specific sub-groups of humans spending relatively much time where fly densities are highest; for  
91 example, fisherman will be often near the water where fly breeding sites are found [1]. It is very well  
92 conceivable that these high-risk individuals would not only be bitten more often (as assumed by  
93 current models), but also more often by flies that previously bit another (or the same) high-risk  
94 individual. Under this assumption, the probability of infections spilling over from the highly exposed  
95 fishermen to the rest of the community is relatively lower, which means that in very low endemic  
96 situations transmission events are not “wasted” on transmission from fishermen to the rest to the  
97 population, but more efficiently used to sustain a high concentration of worms in the fishermen,  
98 sustaining transmission at relatively low prevalence.

99 In this paper, we explore how adding assortative mixing to the individual-based model ONCHOSIM  
100 impacts onchocerciasis equilibrium prevalence levels and can explain stable low prevalence levels.  
101 Furthermore, we show how the (combination of) mechanisms for sustaining low prevalence will be  
102 relevant for the impact of control measures, especially when pushing for elimination. Having shown  
103 its potential importance, we consider what field data might enable us to identify and quantify  
104 assortative mixing in field situations. The findings of our study are also of relevance for other  
105 helminth infections that require mating of male and female worms.

106

## 107 **Methods**

108 We use the model ONCHOSIM, an established individual-based model for transmission and control of  
109 onchocerciasis [16–21]. ONCHOSIM simulates the individual life histories of humans and the male  
110 and female worms living within them. Patent female worms produce microfilariae (mf) as long as  
111 there is at least one patent male worm present in the same host. Flies biting on hosts take up mf, but  
112 their uptake capacity is limited resulting in diminishing returns with increasing mf levels in hosts (i.e.  
113 negative density dependence). Individual human exposure to fly bites is assumed to vary with age  
114 and sex, and to vary randomly between individuals as a consequence of other factors (e.g.  
115 attractiveness, occupation), leading to a highly overdispersed worm population within the human  
116 population. The model further simulates the impact of treatment with ivermectin in context of a  
117 mass drug administration, accounting for variation in participation by age and sex and presence of  
118 potential systematic non-participation by a subset of individuals. Ivermectin is assumed to kill all  
119 microfilariae in treated individuals and to permanently reduce the reproductive capacity of adult

120 female worms by 35%, allowing for cumulative effects of repeated treatments. In addition, after  
121 treatment female worms temporarily stop producing mf but gradually recover to their new  
122 maximum reproductive capacity in a period of 11 months on average. The model provides output in  
123 terms of simulated skin snip surveys (two snips per person), assuming that all individuals in the  
124 population are sampled. More technical details and quantification of the “default” model (i.e. with  
125 homogeneous mixing) can be found elsewhere [20]. To investigate the effect of assortative mixing on  
126 pre-control equilibrium prevalence and intervention impact, the default model was reprogrammed in  
127 R and extended as follows.

128 In the default model, the fly vector population is represented as a single fly population that transmits  
129 infectious material (larvae) from human to human. To simulate assortative mixing we have divided  
130 this fly population into two sub-populations, which we name fly population  $L$  and  $H$  that are relatively  
131 more connected with low and high risk groups of the human population, respectively. As in the  
132 default model, an individual's exposure to fly bites is determined by his or her age, gender, and a  
133 lifelong relative exposure factor  $\gamma_i$  that represents variation due to random factors such as  
134 occupation and attractiveness for flies;  $\gamma_i$  is drawn from a gamma distribution with shape and rate  
135 equal to  $k$  (i.e. mean = 1.0). S1 Figure illustrates the assumed distribution of individual relative  
136 exposure under the default assumption of  $k = 3.5$  (used in previous ONCHOSIM modelling studies)  
137 and an alternative scenario with a higher level of exposure heterogeneity of  $k = 1.0$ , which we  
138 consider to be still realistic and relevant for low endemic situations [19]. For each human  $i$  we define  
139 that his or her vector contacts are divided between the two fly sub-populations as a function of  $\gamma_i$   
140 such that those who are bitten less often are bitten mostly by flies from population  $L$ , and vice versa  
141 those with high exposure to fly bites are bitten most often by flies from population  $H$ . This leads to  
142 assortative mixing, i.e. greater connectedness of individuals with similar risk levels.

143  
144 We define the fraction of an individual's total fly contacts that are with fly population  $H$  (rather than  
145 with fly population  $L$ ) as a function of an individual's relative exposure in terms of his or her  
146 percentile  $r(\gamma_i)$  relative to the rest of the population:  $B\text{-iCDF}(x = r(\gamma_i) | \alpha, \beta)$ . Here  $B\text{-iCDF}$  is the  
147 inverse-cumulative beta distribution function (naturally bounded between 0 and 1) with shape  
148 parameters  $\alpha$  and  $\beta$  and  $r(\cdot)$  is the cumulative gamma distribution function with shape and rate  
149 equal to  $k$ , the model parameter for exposure heterogeneity. We further set  $\alpha = (1 - s) / s$  and  
150  $\beta = ((1 - s) / s) \cdot S$ , where  $s$  (range 0-1) scales the strength of segregation between the two groups  
151 (steepness of the population connection distributional curve in S2 Figure) and  $S$  is solved numerically  
152 such that  $B\text{-iCDF}(x = f_H | \alpha, \beta) = 0.5$ , where  $f_H$  is the parameter for the proportion of the  
153 population that is relatively more exposed to fly population  $H$  (i.e. more than 50% of these  
154 individuals' contacts with flies are with flies from fly population  $H$ ). S2 Figure illustrates the  
155 association between individual relative exposure and different fractions of fly contacts with fly  
156 population  $H$  considered in this paper ( $f_H = 0.5, 0.25$  and  $0.1$ ).

157  
158 When  $s = 1$  we have two fully separate pairs of human and fly populations. When  $s < 1$ , the  
159 association between individual relative exposure and fraction of bites received from fly population  $H$   
160 follows an s-curve (S2 Figure), with higher steepness in the middle for higher values of  $s$ . When  $s = 0$ ,  
161 the fraction of fly contacts that an individual has with flies from fly population  $H$  is the same (i.e.  $f_H$ )  
162 for all individuals, resulting in homogenous mixing. For illustrative purposes, we only consider  
163 relatively strong assortative mixing ( $s = 0.8$ ). For the homogenous mixing scenario, we compare

164 medium ( $k = 3.5$ ) with high ( $k = 1$ ) heterogeneity in individual exposure to fly bites. Note that the  
165 fraction of all fly bites that are from fly population  $H$  will be substantially larger than the fraction of  
166 humans  $f_H$  connected mostly to fly population  $H$ : when  $k = 3.5$ ,  $s = 0.8$ , and  $f_H$  respectively 0.5, 0.25  
167 and 0.1, the fraction of all bites by flies from population  $H$  is 69%, 44% and 26% (see also S3 Figure).

168 The model concepts for assortative mixing described above were implemented in a new version of  
169 the original model [20] which we programmed in R. We simplified the R version of the model for a  
170 limited number of factors that we consider to be of minor relevance to the research question  
171 investigated here. First, the model does not distinguish between male and female humans and  
172 therefore assumes no difference in exposure to fly bites between the sexes. Second, survival of  
173 microfilariae is assumed to be exponential instead of having a fixed duration, which is of limited  
174 importance when comparing the impact of MDA (which kills microfilariae) under different  
175 assumptions about mixing patterns. Third, we do not consider a fraction of individuals that are  
176 permanently excluded from MDA due to pre-existing conditions, nor do we consider non-  
177 participation due to e.g. pregnancy (i.e. everybody is eligible for treatment). We do however only  
178 allow individuals of age five and above to be treated in MDA, as before. Fourth, all worms and  
179 humans are always born at the start of each monthly time step in the model, instead of spread out  
180 over the month. Finally, to explore the potential impact of random vs. systematic MDA participation,  
181 we included the model concept recently developed by Irvine et al. [9], which is more parsimonious  
182 compared to that in ONCHOSIM. With these simplifications, the R version of the ONCHOSIM could  
183 very closely reproduce predictions in terms of prevalence and intensity of infection by the original  
184 model.

185

## 186 **Results**

187 Figure 1 shows how the mean annual fly biting rate (ABR) determines the dynamic equilibrium mf  
188 prevalence level at which onchocerciasis transmission is sustained in the absence of interventions. At  
189 a moderate level of heterogeneity in individual exposure to fly bites (scenario “ $k = 3.5$  (one fly  
190 population)”, i.e. the default assumption in previous ONCHOSIM modelling studies), we see a very  
191 steep decline in equilibrium skin microfilarial (mf) prevalence with decreased ABR, especially at ABR  
192 below 12,000. At around ABR = 10,000 we find a boundary in transmission stability (defined as <50%  
193 probability of extinction during 200 years of simulation time), which is due to a relative low worm  
194 mating probability at lower prevalence combined with the assumed transmission conditions.

195 With greater heterogeneity in individual exposure to fly bites (scenario “ $k = 1.0$  (one fly  
196 population)”), at a high ABR of 20,000 the achieved mf prevalence decreases from about 88% to 79%  
197 (compared to “ $k = 3.5$  (one fly population)”). Stronger heterogeneity implies that there is more  
198 variation in biting rates experienced by people, resulting in a larger proportion of people with very  
199 high number of bites, but also a larger proportion of people experiencing very low number of bites.  
200 The latter group has a relatively low risk of infection, which limits the maximum achievable  
201 prevalence in the simulation. However, in this more heterogeneous setting the prevalence declines  
202 far less steeply with decreasing ABR; that is, transmission remains efficient since those bitten often  
203 both carry high worm burdens and they transmit to more flies. As this concentration of worms within  
204 fewer individuals allows for continued mating, transmission is now sustained (i.e. probability of  
205 extinction <50%) down to mf prevalence of 30%, at an ABR as low as about 7000.

206 Assortative mixing has less of a dampening impact on prevalence at high biting rates, compared to  
207 increasing heterogeneity (i.e. lower values of  $k$ ). Further, it somewhat lowers the threshold ABR  
208 below which extinction occurs, but not as much as lower values of  $k$ . However, it does allow for  
209 sustained transmission at much lower biting rates, especially if there is a relatively small higher risk  
210 sub-group, whose members are connected through a shared population of vectors. When the high-  
211 risk group constitutes 50%, 25% or 10% of the general human population, the model can maintain  
212 stable mf prevalences as low as 28%, 16% or even 8%, respectively.

213 The predicted effect of mass drug administration (MDA) strongly depends on the assumed exposure  
214 heterogeneity as well as the mixing pattern within a population (Figure 2). The probability of  
215 elimination decreases with higher levels of exposure heterogeneity (purple vs. red lines) and when  
216 transmission is concentrated in a smaller part of the population (blue vs. red lines). In case of  
217 recrudescence of infection after stopping MDA, the slope of the rebound over time varies highly  
218 between simulations in the scenario with homogeneous mixing and high exposure heterogeneity  
219 (purple lines), while this variation is much smaller in case of assortative mixing driven by a small  
220 fraction of the human population (blue). Also, the speed of bounce-back is slower in the scenario  
221 where transmission is concentrated in a smaller subgroup of the general population (blue). These  
222 patterns are also seen for other endemicity levels and patterns in MDA participation (S4 Figure).  
223 Table 1 summarises the outcome of simulated scenarios in terms of the probability of elimination  
224 (defined as the proportion of repeated simulations with zero worm prevalence 50 years after  
225 stopping MDA), confirming the patterns in Figure 2.

226 Finally we consider what real-world data might help us identify whether low pre-control prevalences  
227 are the result of stable low transmission facilitated by either assortative mixing or high exposure  
228 heterogeneity, or are the result of a transient decline due to stochastic fade-out. Hypothesising that  
229 assortative mixing and high exposure heterogeneity impact the distribution of intensity of infection  
230 in different ways, we explore the association between prevalence of skin mf and the arithmetic mean  
231 skin mf density in mf positives (Figure 3). At low mf prevalences (<30%) the arithmetic mean density of  
232 mf in mf-positive individuals is considerably higher in settings with strong assortative mixing ( $f_H =$   
233 0.25 and 0.1) compared to in settings with homogeneous mixing with moderate ( $k = 3.5$ ) to high  
234 exposure heterogeneity ( $k = 1.0$ , which we consider a plausible extreme value). As such, relatively  
235 high arithmetic mean skin mf loads in mf positive persons in settings with mf prevalence <30% may be  
236 an indication of stable transmission facilitated by assortative mixing. For settings with pre-control mf  
237 prevalences of 40% to 60%, different mixing conditions and levels of exposure heterogeneity result in  
238 very similar associations between arithmetic mean skin mf density in mf-positives and the mf  
239 prevalence (Figure 3) as well as very similar mf intensity distributions (Figure 4). For settings with mf  
240 prevalence >60%, arithmetic mean skin mf densities are almost identical for different mixing  
241 conditions, but are relatively higher in settings with higher exposure heterogeneity (purple line).

242 Another indication for assortative mixing may be found by considering local level fly data, as  
243 assortative mixing can only play a role if the mean larval intensity is not equally distributed across fly  
244 sub-populations that humans are exposed to. Figure 5 illustrates how the ratio of intensity of  
245 infection in the high and low risk fly populations might change with pre-control mf prevalence in  
246 humans, assuming perfect measurements from locations with minimal overlap of the two fly  
247 populations. A ratio of 1.0 (dashed horizontal black line) represents settings where infection intensity  
248 is uniformly distributed across the fly sub-populations (i.e. homogeneous mixing). This ratio increases



249 strongly with lower mf prevalence in humans, with a difference of factor 10 to 50 for settings with mf  
250 prevalences under 20%. However, the ratio provides little information about the extent to which  
251 transmission is concentrated in a human sub-population (similar curves for different values of  $f_H$ ).

252

## 253 **Discussion**

254 Our study shows that stable low prevalences of onchocerciasis can be explained by both high  
255 exposure heterogeneity and assortative mixing. In contrast, if assortative mixing is the main driver of  
256 sustained low prevalences, the probability of elimination declines when transmission is sustained by  
257 a smaller human sub-population. Also, recrudescence of infection after stopping MDA is slower and  
258 less variable in terms of speed when assortative mixing is driven by a smaller human sub-population.  
259 Pre-control skin mf density distributions provide little information to distinguish exposure  
260 heterogeneity and assortative mixing, or to quantify the degree of assortative mixing. Only in  
261 situations with mf prevalence <30%, high arithmetic mean skin mf densities (>20 mf/ss) in mf positives  
262 may be an indication of assortative mixing. Entomological data may also provide evidence for  
263 presence of assortative mixing, but unfortunately not the size of the human sub-population by which  
264 it is driven.

265 Our findings about the role of assortative mixing also apply to the transmission of other human  
266 helminth infections. Especially for LF, which is transmitted by mosquitoes and also targeted for  
267 elimination, the relatively low mobility of mosquitoes (compared to blackflies) means that people in  
268 the same household are likely to be bitten by the same mosquito sub-population near their  
269 household [15,22]. In this context, differences between LF vector species mobility and biting  
270 behaviour will also be relevant for degree of and patterns in assortative mixing. Similarly,  
271 transmission of soil-transmitted helminths and schistosomiasis most likely takes place through  
272 multiple reservoirs that are situated near households and/or schools, instead of one central reservoir  
273 [23]. Although schistosomiasis and soil-transmitted helminth are not (yet) officially targeted for  
274 elimination, there has been increasing interest in the potential of interrupting transmission [10,24–  
275 26], which means that also here assortative mixing will become an important factor to consider.

276 Our study clearly demonstrates that low prevalence of onchocerciasis could be sustained by  
277 assortative mixing. Another suggested mechanism to explain low prevalences is that infection spills  
278 over from nearby higher endemic areas through movement of infected humans and/or flies [27]. This  
279 is undoubtedly true for many of such settings, and can in fact be considered a form of assortative  
280 mixing at a wider geographical scale, as it simply constitutes flow of infections between two or more  
281 populations with each their own local transmission conditions. As such, we expect that the impact of  
282 migration is qualitatively similar to the impact of assortative mixing that we predict here. Another  
283 logical alternative explanation of (seemingly stable) low endemic levels is that these are the result of  
284 high transmission in the past that has stopped due to changes in human behaviour, demography, the  
285 environment, and/or the impact of (undocumented) interventions. However, such situations are  
286 obviously not stable in the long run.

287 Our study also shows that assortative mixing substantially influences the impact of interventions. Its  
288 importance may be even greater if mixing is correlated with MDA uptake, especially if high-risk  
289 groups are less likely to participate in MDA. If missed, such high-risk groups may reintroduce

290 infection into the general population. As such, if assortative mixing occurs at a very local scale, e.g. at  
291 household level, high coverage of treatment within households may be even more important than  
292 overall population treatment coverage. Further, bounce-back of infection levels is relatively slower  
293 under assortative mixing than with homogeneous mixing and may therefore occur later than  
294 expected, a pattern similar to relatively slower outbreaks of malaria in populations where mixing is  
295 more assortative [15]. Therefore, identifying, treating, and monitoring of high-risk groups is highly  
296 important. Similarly, if vector control is considered, locating and targeting those breeding sites that  
297 are most important for transmission is pivotal. The same applies if low prevalences are sustained by  
298 movement of infected humans and/or flies over larger distances; uniform intervention coverage and  
299 in particular coverage of high risk groups/areas is pivotal to minimise the risk of recrudescence of  
300 infection after stopping interventions.

301 Unfortunately, proving existence and quantifying the degree of assortative mixing with data may not  
302 be easy. If assortative mixing plays a relevant role in helminth transmission, it is most likely related to  
303 patchy distribution of vectors or environmental reservoirs of infection. For example, onchocerciasis  
304 transmission in forest areas is sometimes driven by multiple smaller fly breeding sites. Because in  
305 savanna areas the number of fly breeding sites that a village is exposed to is typically limited,  
306 assortative mixing (if any) may be more likely to be driven by a sub-group of individuals (e.g.  
307 fishermen) that frequent a breeding site further away from the community. In both cases, local fly  
308 data from such areas may be informative. More specifically, locally high prevalence among flies  
309 and/or annual transmission potential (i.e. the number of fly bites times the average number of L3  
310 larvae per fly bite) could perhaps be linked to a specific sub-group of humans that spend more time  
311 near certain fly breeding sites. In addition, data on the intensity distribution of infection in a  
312 community may provide some information in communities where prevalence of infection is under  
313 30%, although subtle patterns may easily be masked by measurement and sampling error.  
314 Eventually, genetic studies may provide an answer to the question who infects whom. Although such  
315 studies have not yet been attempted, genome-wide analyses of *Onchocerca volvulus* populations  
316 have been performed in Cameroon and Ghana, demonstrating that this technique is able to  
317 genetically distinguish geographically separate worm populations (i.e. populations that mix in a  
318 limited fashion) [28]. To what extent such analyses can be used to quantify the degree of past and  
319 ongoing mixing remains to be investigated. For soil-transmitted helminths and schistosomiasis,  
320 quantitative studies of human open defaecation may help inform the degree and importance of  
321 assortative mixing for transmission and impact. Although challenging to reliably quantify,  
322 questionnaires about or direct observations of where uniquely identified people defaecate exactly  
323 (preferably repeated over a period of time) could help quantify the spatial patchiness of transmission  
324 sites and how often they are frequented by whom, allowing construction of more realistic  
325 transmission models that account for assortative mixing.

326 We realise that our implementation of assortative mixing is a simplification of reality. In real-world  
327 situations more than two risk groups may well exist, and the degree of assortative mixing between  
328 such groups may differ from what we assume here. Still, a related modelling study on hepatitis C  
329 transmission in and between the general populations and high-risk groups demonstrated that simply  
330 adding the process of assortative mixing itself captures much of the qualitative behaviour of a  
331 system, and adding more risk groups to the system does not change its behaviour much [29].



332 In conclusion, assortative mixing could play an important role in helminth transmission dynamics, but  
333 is difficult to measure in real-world situations. The presence of assortative mixing will reduce the  
334 chance of achieving interruption of transmission. More detailed data on infection intensity  
335 distribution in human and vector populations (or environmental reservoirs), and actual contact rates  
336 between humans and vectors or environmental reservoirs are needed to answer to which extent  
337 assortative mixing plays a role in reality. For modelling studies, introducing the phenomenon of  
338 assortative mixing will help to explain low stable endemic situations.

339

## 340 References

- 341 1. Zouré H, Noma M, Tekle AH, Amazigo UV, Diggle PJ, et al. (2014) The geographic distribution  
342 of onchocerciasis in the 20 participating countries of the African Programme for  
343 Onchocerciasis Control: (2) pre-control endemicity levels and estimated number infected.  
344 *Parasit Vectors* **7**.
- 345 2. O’Hanlon SJ, Slater HC, Cheke RA, Boatman BA, Coffeng LE, et al. (2016) Model-Based  
346 Geostatistical Mapping of the Prevalence of *Onchocerca volvulus* in West Africa. *PLoS Med* **10**:  
347 e0004328.
- 348 3. African Programme for Onchocerciasis Control (2015) Report of the consultative meetings on  
349 strategic options and alternative treatment strategies for accelerating onchocerciasis  
350 elimination in Africa.
- 351 4. Anderson RM, May RM (1985) Helminth infections of humans: mathematical models,  
352 population dynamics, and control. *Adv Parasitol* **24**: 1–101.
- 353 5. Duerr HP, Raddatz G, Eichner M (2011) Control of onchocerciasis in Africa: threshold shifts,  
354 breakpoints and rules for elimination. *Int J Parasitol* **41**: 581–589.
- 355 6. Basáñez MG, Walker M, Turner HC, Coffeng LE, de Vlas SJ, et al. (2016) River Blindness:  
356 Mathematical Models for Control and Elimination. *Adv Parasitol* **94**: 247–341.
- 357 7. Stolk WA, Stone C, de Vlas SJ (2015) Modelling Lymphatic Filariasis Transmission and Control:  
358 Modelling Frameworks, Lessons Learned and Future Directions. *Adv Parasitol*. Vol. 87. pp.  
359 249–291.
- 360 8. Coffeng LE, Bakker R, Montresor A, de Vlas SJ (2015) Feasibility of controlling hookworm  
361 infection through preventive chemotherapy: a simulation study using the individual-based  
362 WORMSIM modelling framework. *Parasit Vectors* **8**: 541.
- 363 9. Irvine MA, Reimer LJ, Njenga SM, Gunawardena S, Kelly-Hope L, et al. (2015) Modelling  
364 strategies to break transmission of lymphatic filariasis - aggregation, adherence and vector  
365 competence greatly alter elimination. *Parasit Vectors* **8**: 547.
- 366 10. Anderson RM, Turner HC, Farrell SH, Yang J, Truscott JE (2015) What is required in terms of  
367 mass drug administration to interrupt the transmission of schistosome parasites in regions of  
368 endemic infection? *Parasit Vectors* **8**: 553.
- 369 11. Garnett GP, Hughes JP, Anderson RM, Stoner BP, Aral SO, et al. (1996) Sexual mixing patterns  
370 of patients attending sexually transmitted diseases clinics. *Sex Transm Dis* **23**: 248–257.
- 371 12. Mossong J, Hens N, Jit M, Beutels P, Auranen K, et al. (2008) Social contacts and mixing

- 372 patterns relevant to the spread of infectious diseases. *PLoS Med* **5**: 0381–0391.
- 373 13. De Vos AS, Van der Helm JJ, Prins M, Kretzschmar ME (2012) Determinants of persistent  
374 spread of HIV in HCV-infected populations of injecting drug users. *Epidemics* **4**: 57–67.
- 375 14. Rozhnova G, van der Loeff MFS, Heijne JCM, Kretzschmar ME (2016) Impact of Heterogeneity  
376 in Sexual Behavior on Effectiveness in Reducing HIV Transmission with Test-and-Treat  
377 Strategy. *PLoS Comp Biol* **12**.
- 378 15. Perkins TA, Scott TW, Le Menach A, Smith DL (2013) Heterogeneity, Mixing, and the Spatial  
379 Scales of Mosquito-Borne Pathogen Transmission. *PLoS Comp Biol* **9**: e1003327.
- 380 16. Plaisier AP, van Oortmarsen GJ, Habbema JD, Remme J, Alley ES (1990) ONCHOSIM: a model  
381 and computer simulation program for the transmission and control of onchocerciasis. *Comput*  
382 *Methods Programs Biomed* **31**: 43–56.
- 383 17. Plaisier AP, Alley ES, Boatin BA, Van Oortmarsen GJ, Remme H, et al. (1995) Irreversible  
384 effects of ivermectin on adult parasites in onchocerciasis patients in the Onchocerciasis  
385 Control Programme in West Africa. *J Infect Dis* **172**: 204–210.
- 386 18. Nagelkerke NJD, de Vlas SJ, Alley ES (2002) Validation of parasite transmission models: The  
387 example of onchocerciasis. *Neth J Med* **60**: 44–49.
- 388 19. Coffeng LE, Stolk WA, Hoerauf A, Habbema D, Bakker R, et al. (2014) Elimination of African  
389 onchocerciasis: modeling the impact of increasing the frequency of ivermectin mass  
390 treatment. *PLoS One* **9**: e115886.
- 391 20. Stolk WA, Walker M, Coffeng LE, Basáñez M-G, de Vlas SJ (2015) Required duration of mass  
392 ivermectin treatment for onchocerciasis elimination in Africa: a comparative modelling  
393 analysis. *Parasit Vectors* **8**: 552.
- 394 21. Tekle AH, Zouré HGM, Noma M, Boussinesq M, Coffeng LE, et al. (2016) Progress towards  
395 onchocerciasis elimination in the participating countries of the African Programme for  
396 Onchocerciasis Control: epidemiological evaluation results. *Infect Dis Poverty* **5**: 66.
- 397 22. Smith DL, Perkins TA, Reiner RC, Barker CM, Niu T, et al. (2014) Recasting the theory of  
398 mosquito-borne pathogen transmission dynamics and control. *Trans R Soc Trop Med Hyg* **108**:  
399 185–197.
- 400 23. Coffeng LE, Truscott JE, Farrell SH, Turner HC, Sarkar R, et al. (2017) Comparison and  
401 validation of two mathematical models for the impact of mass drug administration on *Ascaris*  
402 *lumbricoides* and hookworm infection. *Epidemics* **18**: 38–47.
- 403 24. Ásbjörnsdóttir KH, Ajjampur SSR, Anderson RM, Bailey R, Gardiner I, et al. (2018) Assessing  
404 the feasibility of interrupting the transmission of soil-transmitted helminths through mass  
405 drug administration: The DeWorm3 cluster randomized trial protocol. *PLoS Negl Trop Dis* **12**:  
406 e0006166.
- 407 25. Truscott JE, Hollingsworth TD, Brooker SJ, Anderson RM (2014) Can chemotherapy alone  
408 eliminate the transmission of soil transmitted helminths? *Parasit Vectors* **7**: 266.
- 409 26. Truscott J, Hollingsworth TD, Anderson RM (2014) Modeling the interruption of the  
410 transmission of soil-transmitted helminths by repeated mass chemotherapy of school-age  
411 children. *PLoS Negl Trop Dis* **8**: e3323.

- 412 27. Katarawa MN, Eyamba A, Chouaibou M, Enyong P, Kuété T, et al. (2010) Does onchocerciasis  
413 transmission take place in hypoendemic areas? a study from the North Region of Cameroon.  
414 *Trop Med Int Heal* **15**: 645–652.
- 415 28. Doyle SR, Bourguinat C, Nana-Djeunga HC, Kengne-Ouafo JA, Pion SDS, et al. (2017) Genome-  
416 wide analysis of ivermectin response by *Onchocerca volvulus* reveals that genetic drift and  
417 soft selective sweeps contribute to loss of drug sensitivity. *PLoS Negl Trop Dis* **11**: e0005816.
- 418 29. Vos AS (2014) Heterogeneity in risk-behaviour matters; modelling the spread of HIV and  
419 hepatitis C virus among injecting drug users. Utrecht University.
- 420
- 421

422 **Table1. Impact of mixing patterns on probability of elimination.**

| Scenario                                                                                   | Probability of elimination (range 0-1) <sup>a</sup> |                                                |                                                 |
|--------------------------------------------------------------------------------------------|-----------------------------------------------------|------------------------------------------------|-------------------------------------------------|
|                                                                                            | Random MDA participation <sup>b</sup>               | Semi-systematic MDA participation <sup>b</sup> | Fully systematic MDA participation <sup>b</sup> |
| <i>40% pre-control mf prevalence in age 5+ and 5 rounds of annual MDA at 65% coverage</i>  |                                                     |                                                |                                                 |
| k = 3.5 (one fly population)                                                               | 0.98                                                | 0.97                                           | 0.85                                            |
| k = 3.5, $f_H = 0.50$ , mixt = 0.8                                                         | 0.67                                                | 0.60                                           | 0.52                                            |
| k = 3.5, $f_H = 0.25$ , mixt = 0.8                                                         | 0.02                                                | 0.03                                           | 0.01                                            |
| k = 3.5, $f_H = 0.10$ , mixt = 0.8                                                         | 0.01                                                | 0.00                                           | 0.00                                            |
| k = 1.0 (one fly population)                                                               | 0.42                                                | 0.33                                           | 0.27                                            |
| <i>50% pre-control mf prevalence in age 5+ and 7 rounds of annual MDA at 65% coverage</i>  |                                                     |                                                |                                                 |
| k = 3.5 (one fly population)                                                               | 0.99                                                | 1.00                                           | 0.93                                            |
| k = 3.5, $f_H = 0.50$ , mixt = 0.8                                                         | 0.65                                                | 0.51                                           | 0.25                                            |
| k = 3.5, $f_H = 0.25$ , mixt = 0.8                                                         | 0.04                                                | 0.03                                           | 0.00                                            |
| k = 3.5, $f_H = 0.10$ , mixt = 0.8                                                         | 0.02                                                | 0.02                                           | 0.01                                            |
| k = 1.0 (one fly population)                                                               | 0.28                                                | 0.32                                           | 0.14                                            |
| <i>60% pre-control mf prevalence in age 5+ and 11 rounds of annual MDA at 65% coverage</i> |                                                     |                                                |                                                 |
| k = 3.5 (one fly population)                                                               | 1.00                                                | 1.00                                           | 0.98                                            |
| k = 3.5, $f_H = 0.50$ , mixt = 0.8                                                         | 0.99                                                | 0.86                                           | 0.38                                            |
| k = 3.5, $f_H = 0.25$ , mixt = 0.8                                                         | 0.54                                                | 0.25                                           | 0.06                                            |
| k = 3.5, $f_H = 0.10$ , mixt = 0.8                                                         | 0.26                                                | 0.21                                           | 0.08                                            |
| k = 1.0 (one fly population)                                                               | 0.57                                                | 0.39                                           | 0.06                                            |

423 <sup>a</sup> Elimination is defined as zero mf prevalence 50 years after stopping MDA; probability of elimination is defined  
 424 as the fraction of 200 repeated simulations that meet aforementioned criterion.

425 <sup>b</sup> Random MDA participation means that every eligible individual is just as likely to participate; fully systematic  
 426 participation means that always the same eligible persons participate; semi-systematic participation is a mix of  
 427 random and fully systematic participation.

428

429

430 **Figure 1. Model-predicted association between annual biting rate, prevalence of skin microfilariae,**  
431 **and stability of transmission.** Bullets represent the average skin mf prevalence over 150 repeated  
432 simulations, with the shape of the bullet indicating the extinction probability (here defined as the  
433 proportion of repeated simulations in which transmission spontaneously faded out within 200 years).  
434 The red and purple lines (with  $k = 3.5$  or  $1.0$  and one fly population) represent transmission scenarios  
435 with homogeneous mixing; the other coloured lines represent transmission scenarios with  
436 assortative mixing, assuming presence of two fly populations where some proportion  $f_H$  of the  
437 human population with relative high exposure to flies has most of its contact with the fly population  
438  $H$ . Parameter  $s$  represents the level of segregation of the two fly populations, e.g.  $s = 0$  represents  
439 homogeneous mixing (presence of two populations but all humans have equal opportunity to be  
440 exposed to both) and  $s = 1$  represents two completely segregated fly populations for which the biting  
441 affects two completely segregated human populations. See methods section for details.

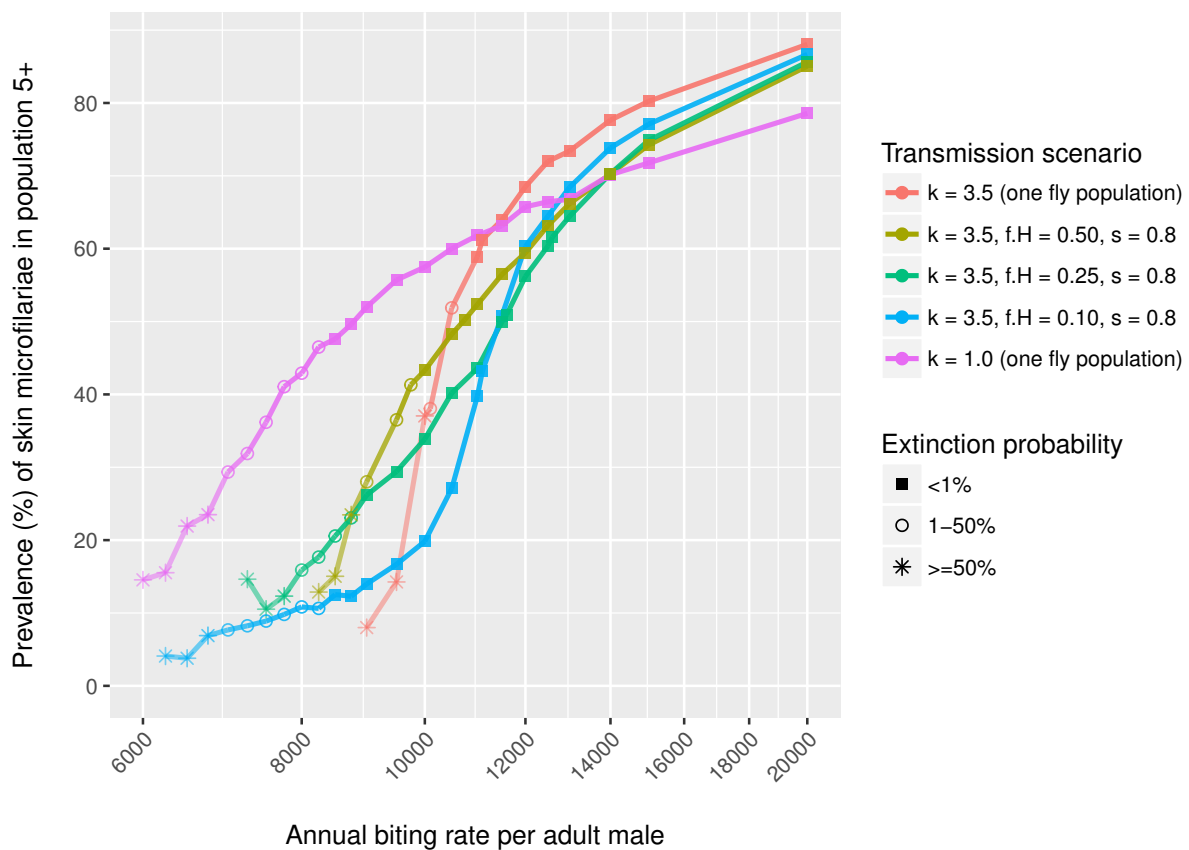

442

443

444 **Figure 2. The influence of mixing patterns on trends in prevalence of skin microfilariae during mass**  
445 **drug administration.** Lines represent results repeated simulations for a fixed annual biting that was  
446 tuned (given exposure heterogeneity  $k$  and assumed mixing pattern) to result in an average pre-  
447 control prevalence of about 50% in the population of age 5 and above. In each simulation, 7 mass  
448 drug administration (MDA) rounds are implemented at 65% coverage of the general population.  
449 Participation to MDA was assumed to be semi-systematic (some individuals are structurally more  
450 likely to participate than others). S4 Figure illustrates similar results for other pre-control endemicity  
451 levels and assumed patterns in MDA participation.

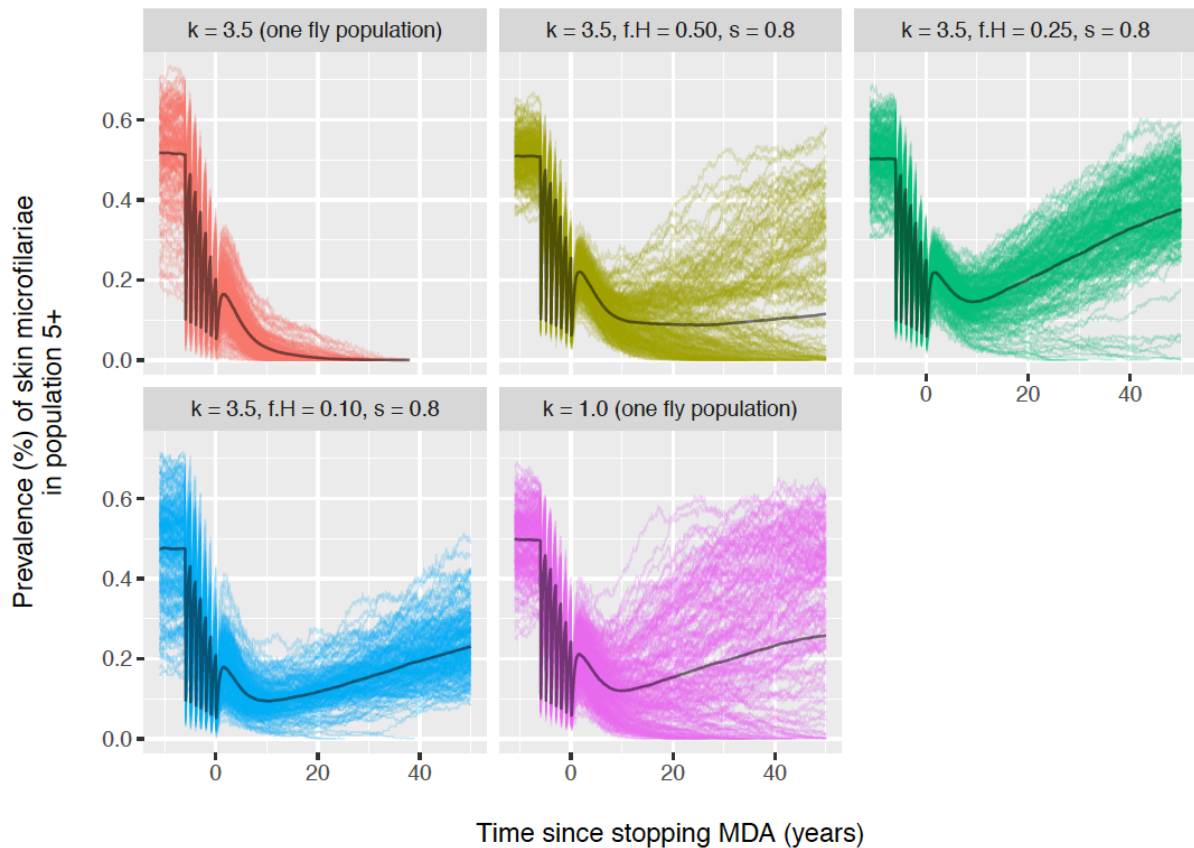

452

453

454

455

456



457 **Figure 3. Pre-control arithmetic mean density of mf in the skin among mf-positive individuals of age**  
458 **5+ and above.** Lines are based on a generalised additive model with integrated smoothness  
459 estimation, fitted to predicted mf prevalences and intensities of repeated simulations for the same  
460 range and values of annual biting rate (ABR) used in Figure 1. For each value of ABR 150 repeated  
461 simulations were performed. Individual simulation results and the fit of the generalised additive  
462 model can be found in S5 Figure. Note that in all scenarios a mean microfilarial density below ~15  
463 mf/ss in the mf-positive population is indicative of stochastic fade-out taking place (i.e. as incidence  
464 declines the worm population ages, resulting in lower mf production per female worm).

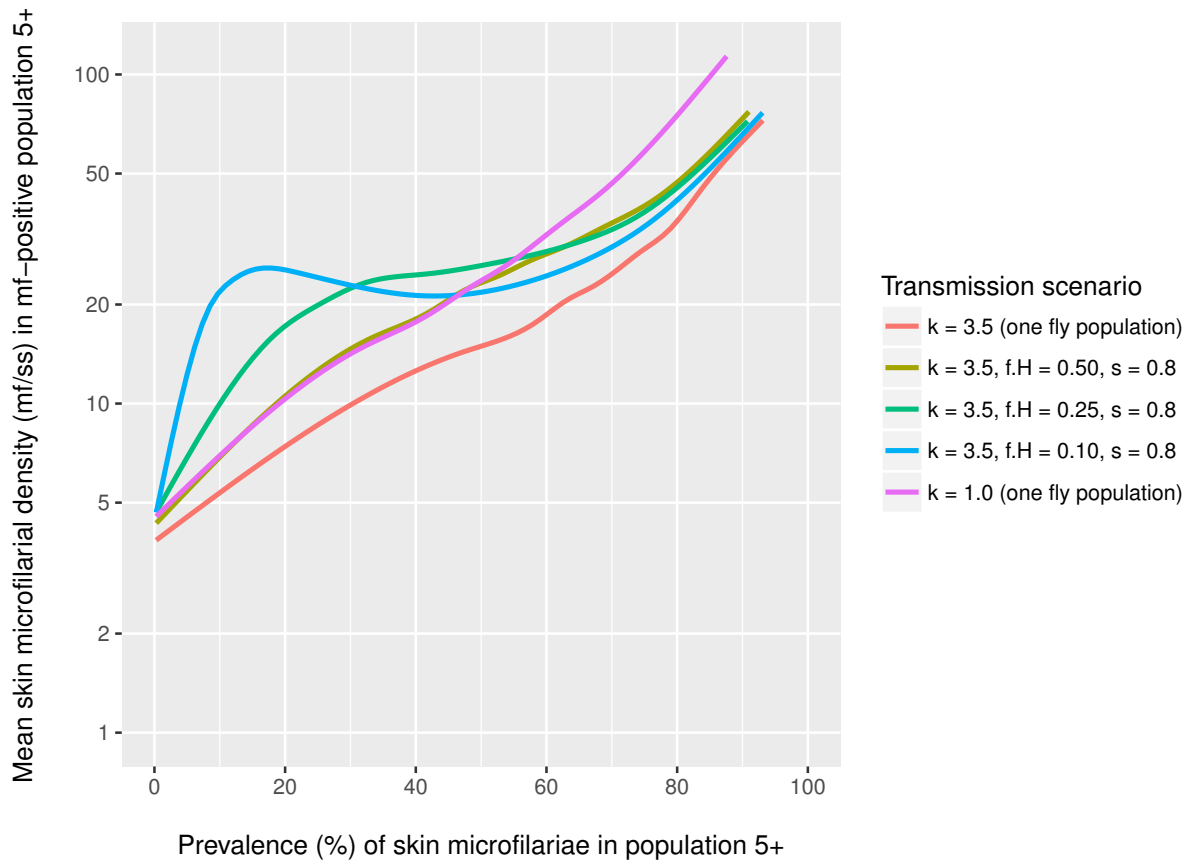

465

466

467 **Figure 4. Distribution of skin microfilarial density in mf-positive individuals in different**  
468 **transmission scenarios and endemicity levels.** Distributions are based on the average of 150  
469 repeated simulation for each of three fixed values of the annual biting rate that result in an average  
470 pre-control mf prevalence of 40%, 50%, and 60% in the population of age 5 and above (three panels).

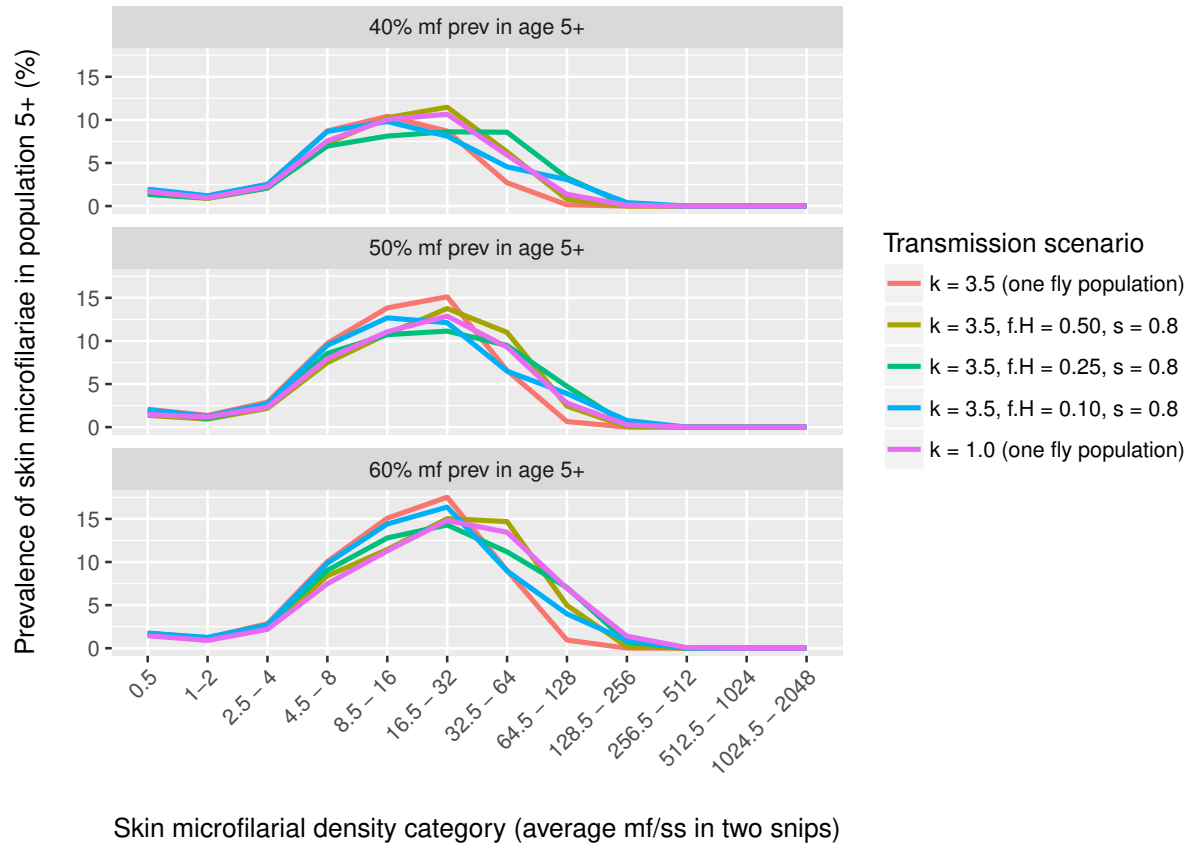

472 **Figure 5. Ratio of larval infection intensity in two spatially separate samples of blackflies around a**  
473 **single community as an indicator of assortative mixing.** Each bullets represents the result of a single  
474 simulation. Simulations were run using the same range and values of annual biting rate (ABR) as used  
475 in Figure 1, and for each value of ABR 150 repeated simulations were performed. For comparison, a  
476 ratio close to 1.0 (horizontal dashed black line) would indicate that flies from two spatially separate  
477 samples bite humans with a similar distribution of infection levels (i.e. under the assumption of  
478 homogeneous mixing). Lines are based on a generalised additive model with integrated smoothness  
479 estimation, fitted to individual bullets.

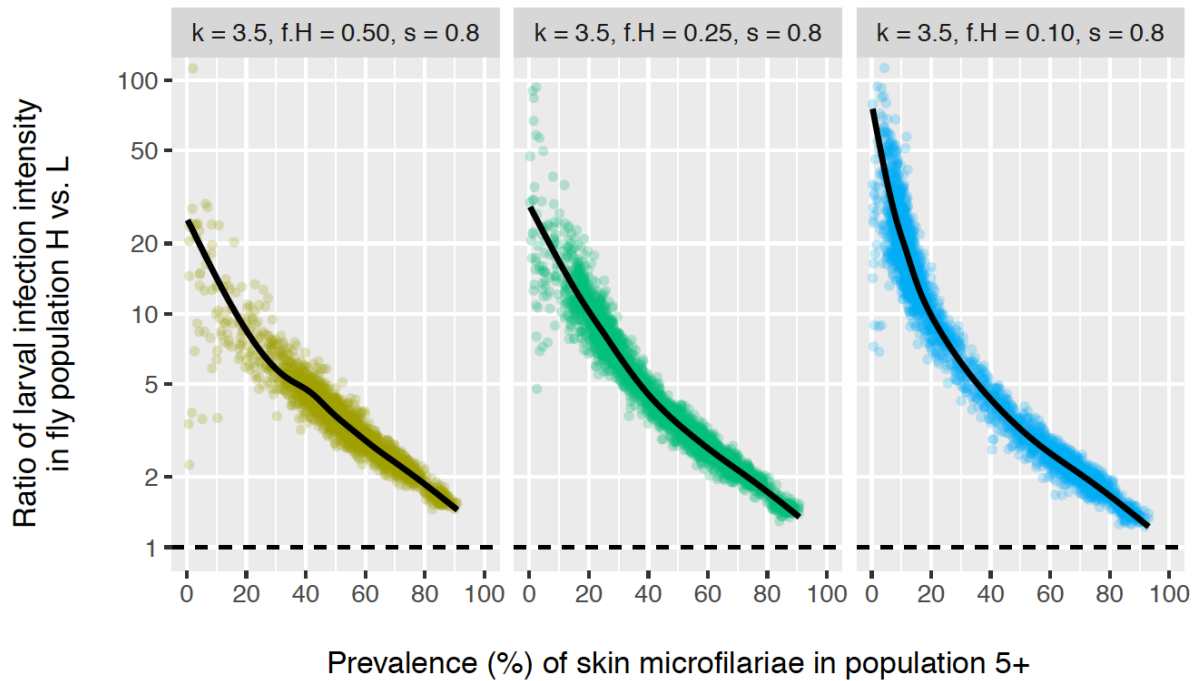

480

481 **S1 Figure. Assumed distribution of relative exposure to fly bites in the human population.** Relative  
482 individual exposure to fly bites is assumed to follow a gamma distribution with shape and rate equal  
483 to  $k$  (3.5 or 1.0) and mean 1.0 (dashed vertical line).

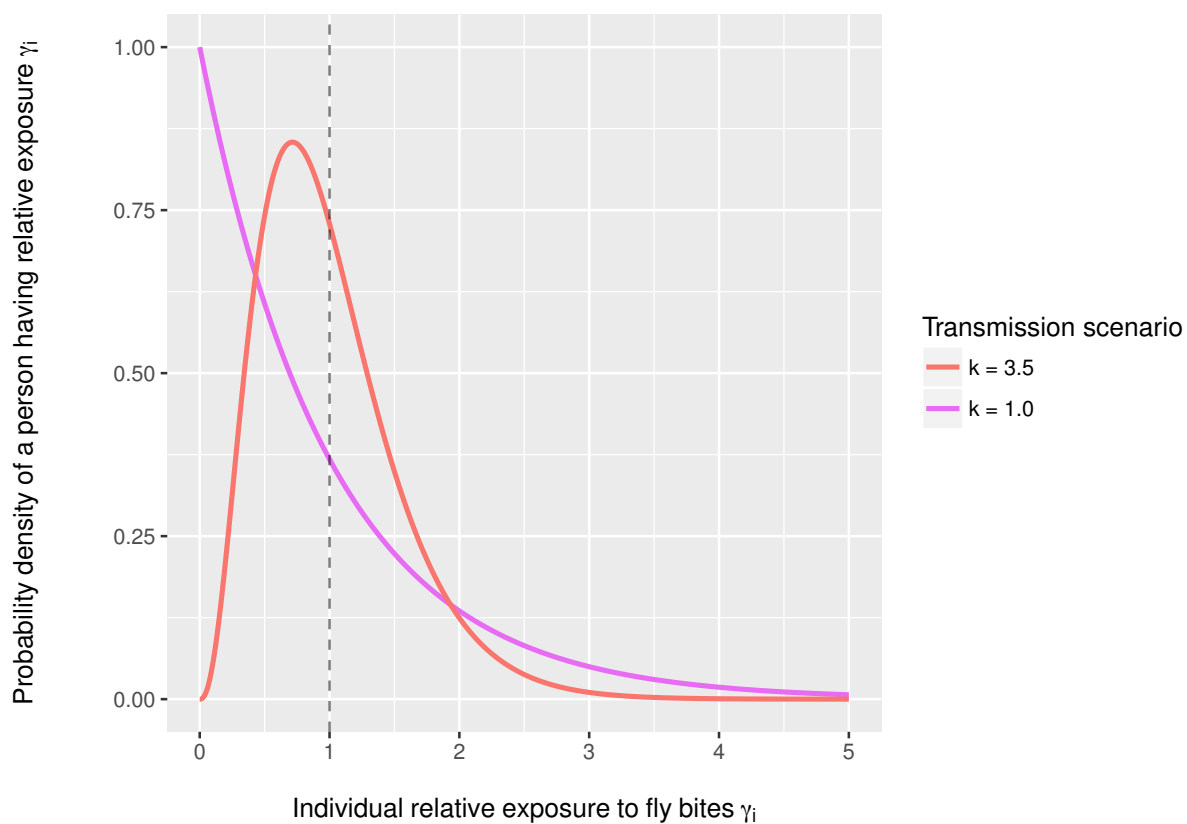

484

485

486 **S2 Figure. Assumed association between individual relative exposure to fly bites and fraction of**  
487 **bites received from fly population  $H$ .** Red (dashed) and purple lines overlap perfectly because they  
488 both represent a setting where all individuals are equally exposed to the two fly populations in the  
489 model, which means that the two populations effectively function as a single fly population that  
490 mixes homogeneously with the human population.

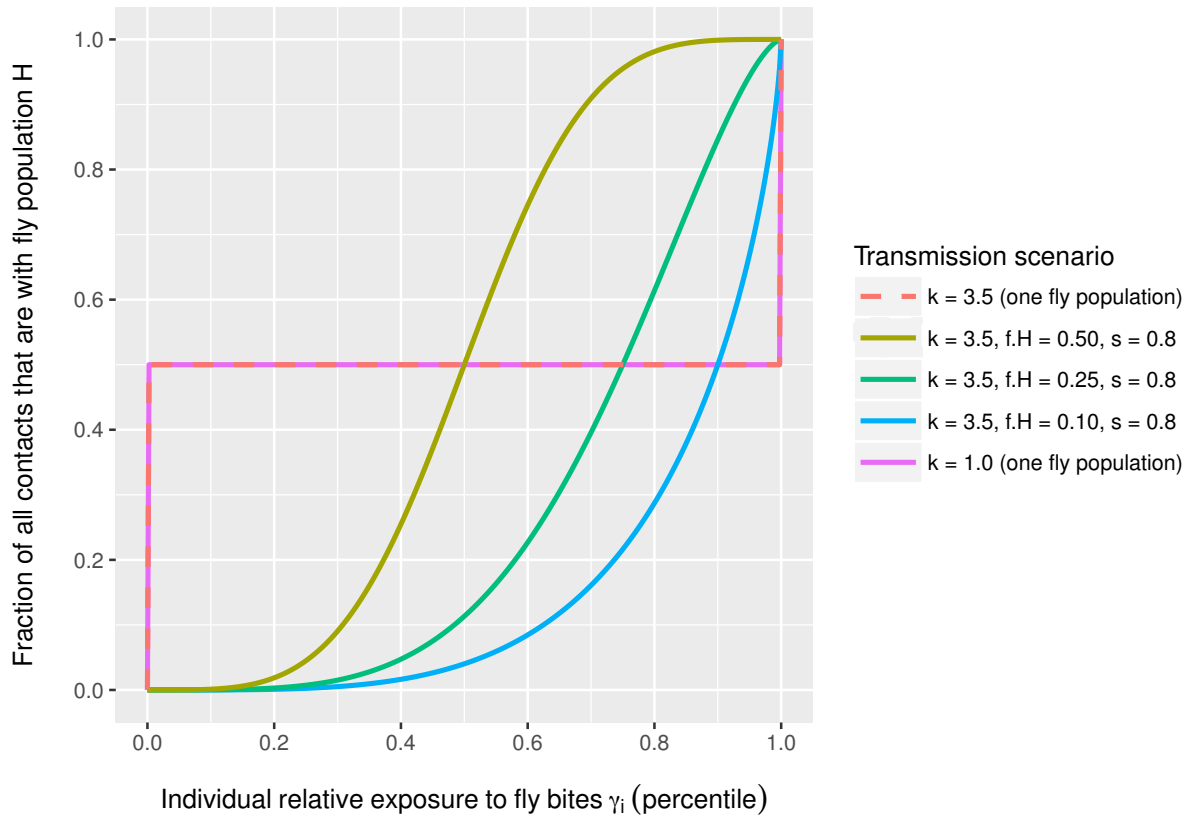

491

492

493 **S3 Figure. Probability density that a fly will bite a person with a given relative exposure for**  
494 **transmission scenarios with either one fly population (red and purple) or two fly populations**  
495 **(other colours). Darker areas represent bites by flies from fly population  $H$ .**

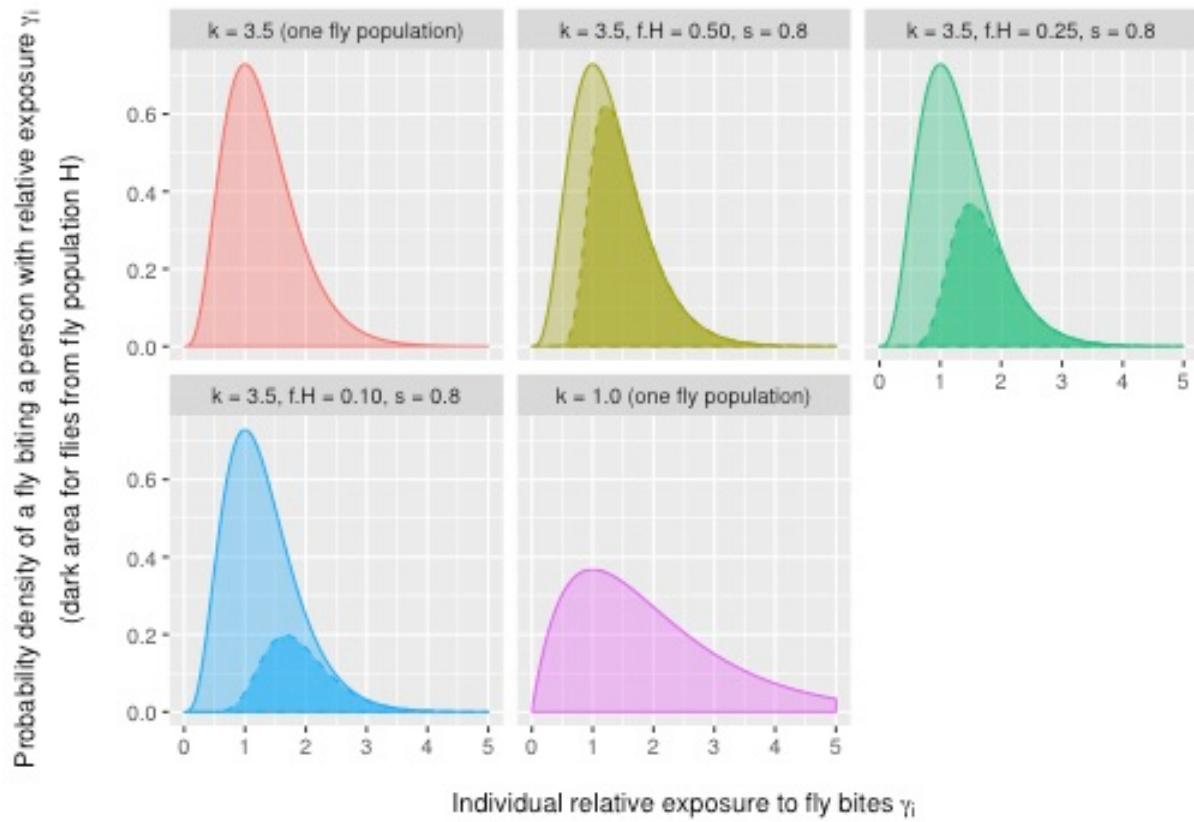

496

497



498 **S4 Figure. The influence of mixing patterns on trends in prevalence of skin microfilariae during**  
499 **mass drug administration.** Simulations represent three setting with pre-control prevalence of about  
500 40%, 50%, or 60% in the population of age 5 and above where 5, 7, or 11 rounds of mass drug  
501 administration rounds are implemented at 65% coverage of the general population (rows of panels).  
502 Columns of panels represent three different assumptions about patterns in MDA participation:  
503 completely random (participation to MDA is independent of past participation) vs. semi-systematic  
504 (as in Figure 2) vs. completely systematic (same individuals always participate). Lines represent the  
505 average of 200 repeated simulations, including simulations that resulted in elimination.

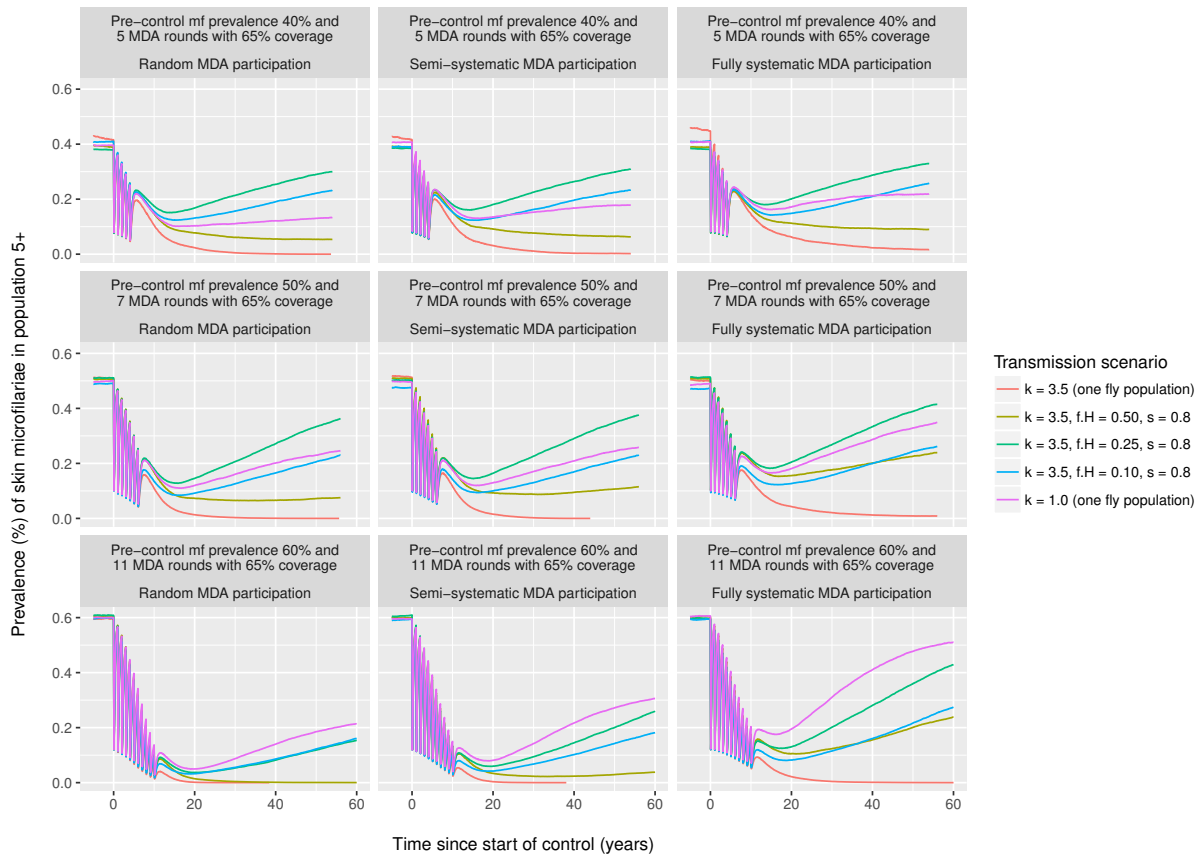

506

507

508

509 **S5 Figure. Pre-control density of mf in the skin among mf-positive individuals of age 5+ and above.**

510 Each bullet represents the result of a single simulation. Simulation were run using the same range  
511 and values of annual biting rate (ABR) as used in Figure 1, and for each value of ABR 150 repeated  
512 simulations were performed. Lines are based on a generalised additive model with integrated  
513 smoothness estimation, fitted to the individual bullets.

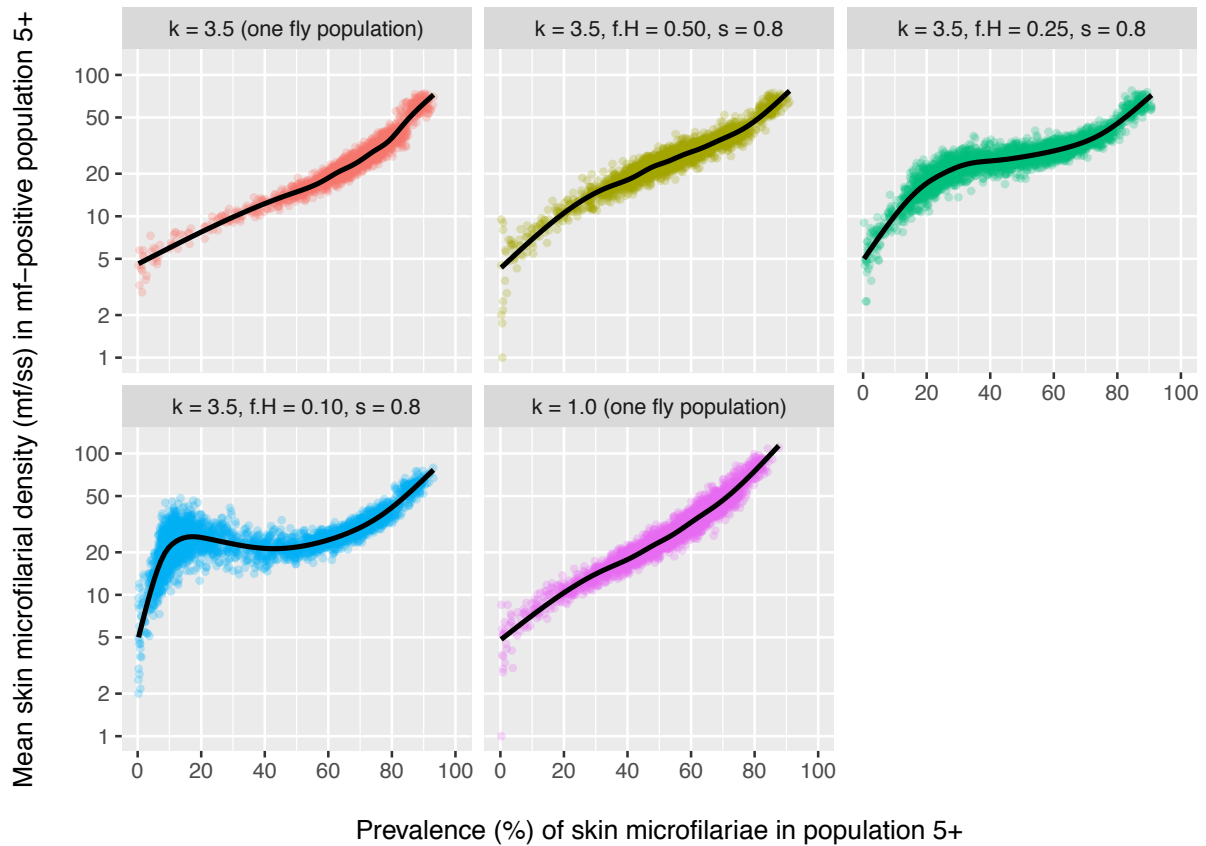

514

515

516

517 **S6 Model code.** R scripts to run the model and analyses.
